# Supplementary material for: A novel C,D-spirolactone analogue of paclitaxel: autophagy instead of apoptosis as a previously unknown mechanism of cytotoxic action for taxoids
Source: Royal Society of Chemistry journal article supplement (doi:10.1039/c2ob25514f), 2012-01-01
Supplement: c2ob25514f.pdf [file c2ob25514f.pdf]

## Electronic Supplementary Information

# **A Novel C,D-Spirolactone Analogue of Paclitaxel: Autophagy Instead of Apoptosis as a Previously Unknown Mechanism of Cytotoxic Action for Taxoids**

*Milena V. Trmcic, Radomir V. Matovic, Gordana I. Tovilovic, Biljana Z. Ristic, Vladimir S.*

*Trajkovic, Zorana B. Ferjancic, Radomir N. Saicic*

### Table of Contents:

|                                                                                                                        |     |
|------------------------------------------------------------------------------------------------------------------------|-----|
| - <sup>1</sup> H NMR and <sup>13</sup> C NMR spectra of compounds <b>8-13</b> , <b>15</b> , <b>16</b> , <b>6</b> ..... | S2  |
| - Tubulin polymerization assay – data for compound <b>6</b> .....                                                      | S11 |
| - Cytotoxicity of paclitaxel and compound <b>6</b> in L929 mouse fibrosarcoma cells.....                               | S13 |

Compound 8

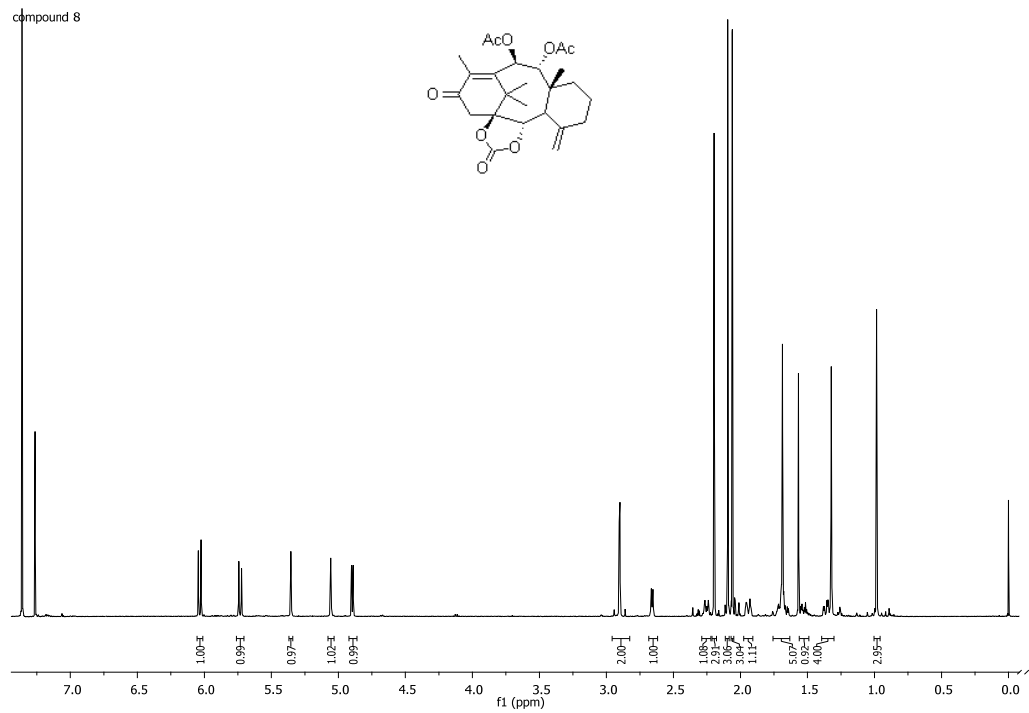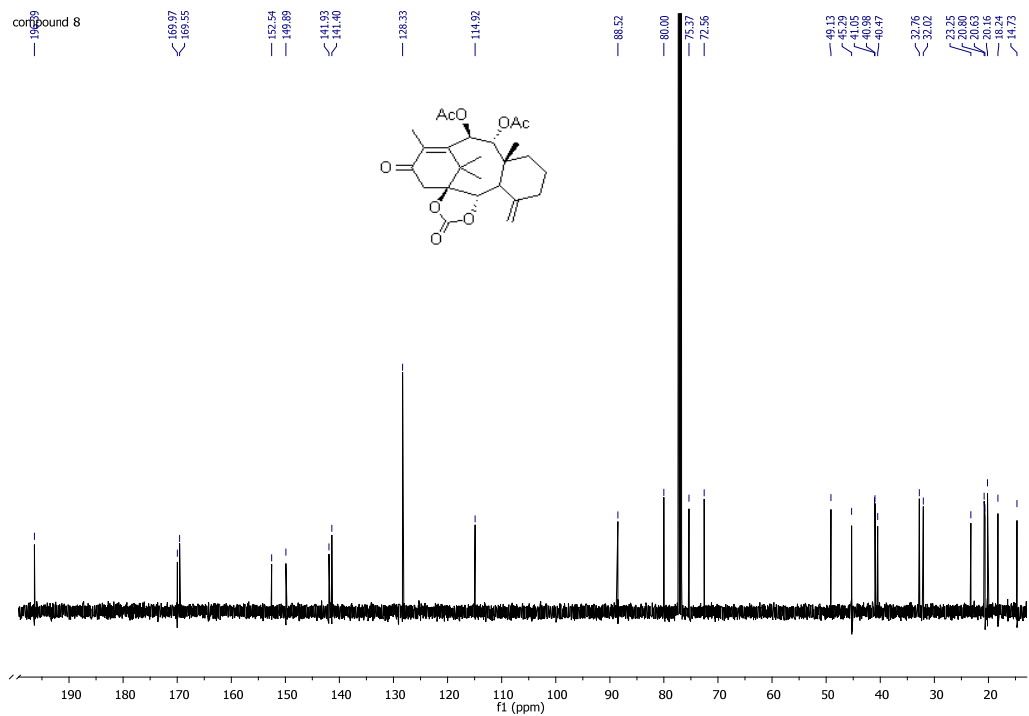

Compound 9

compound 9

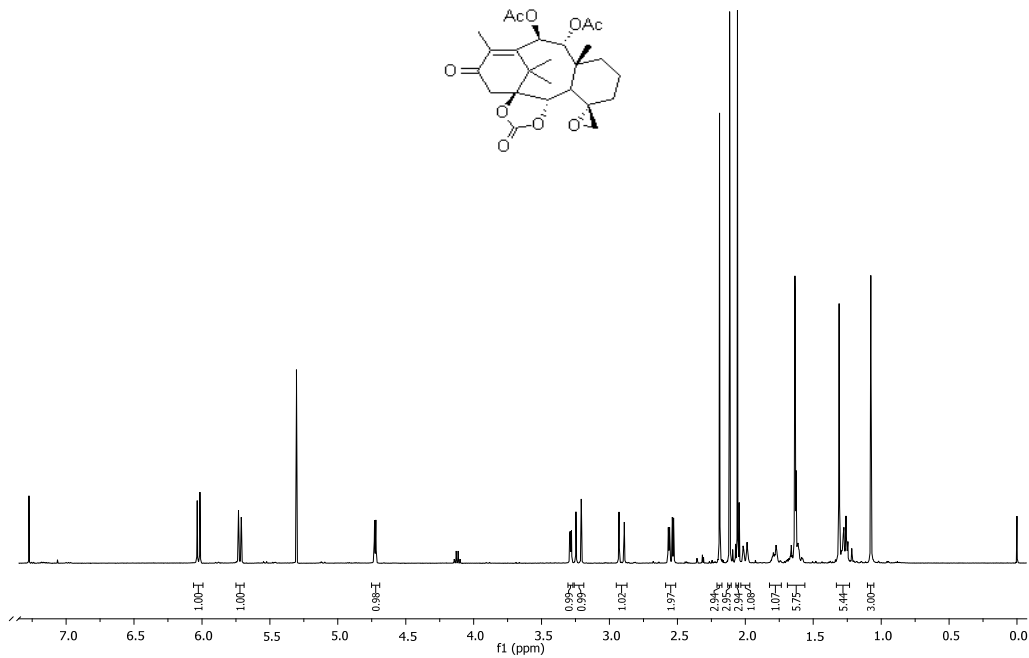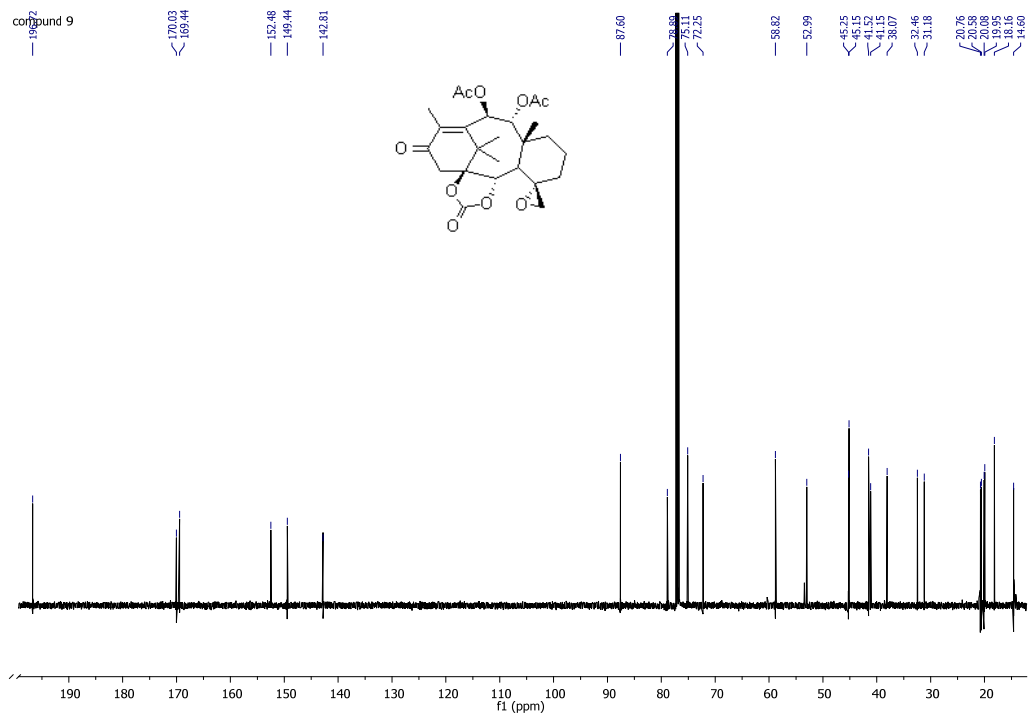



Compound 11

compound 11

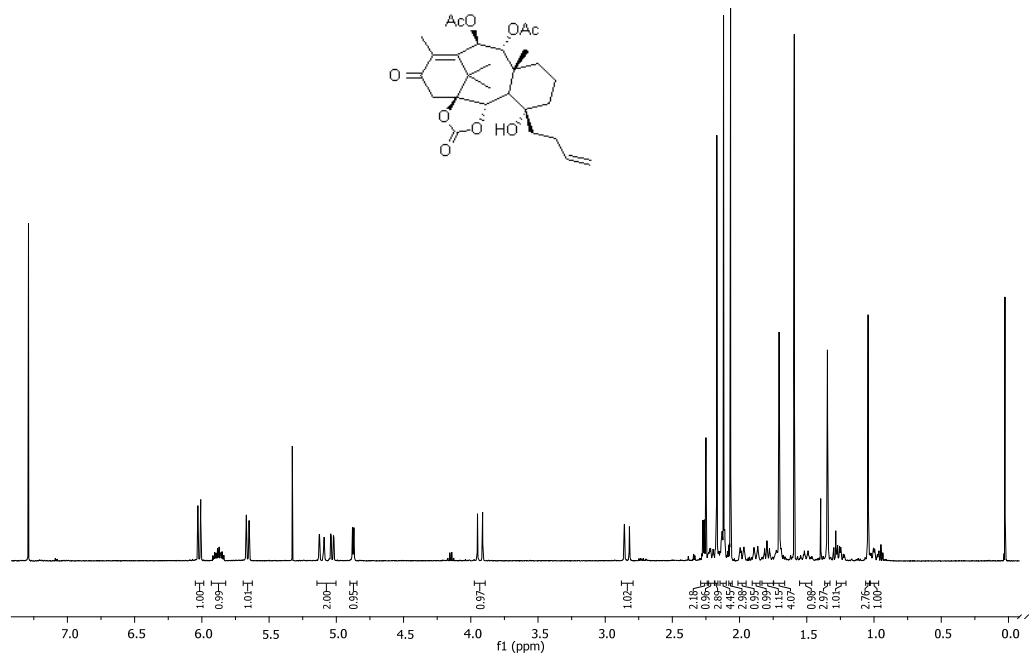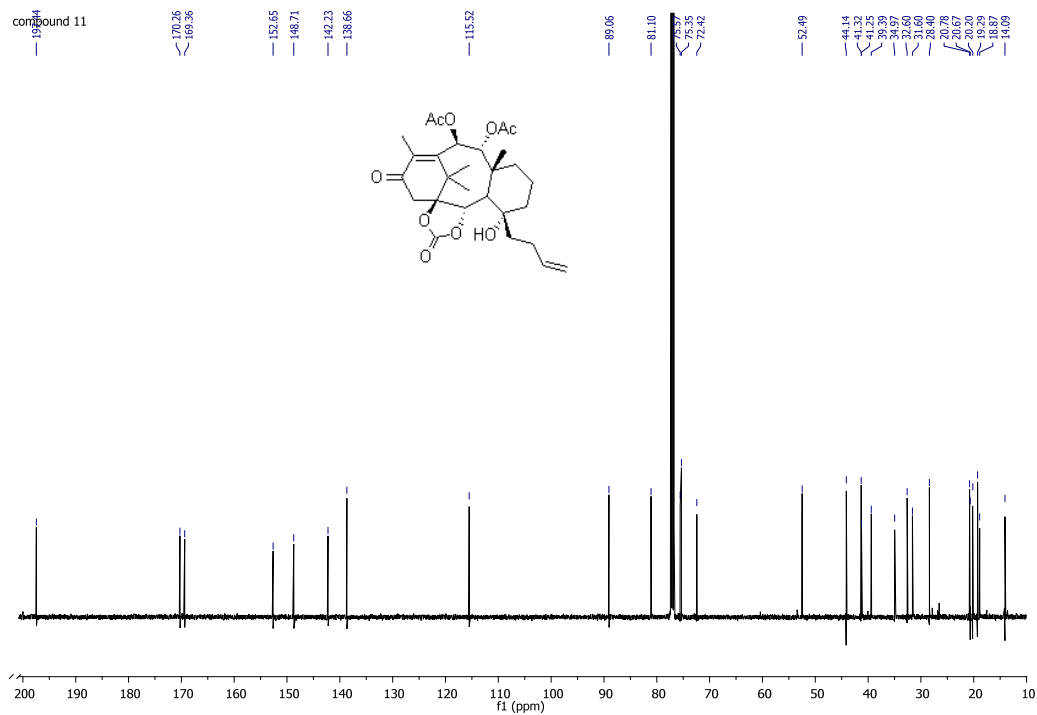



Compound 13

compound 13

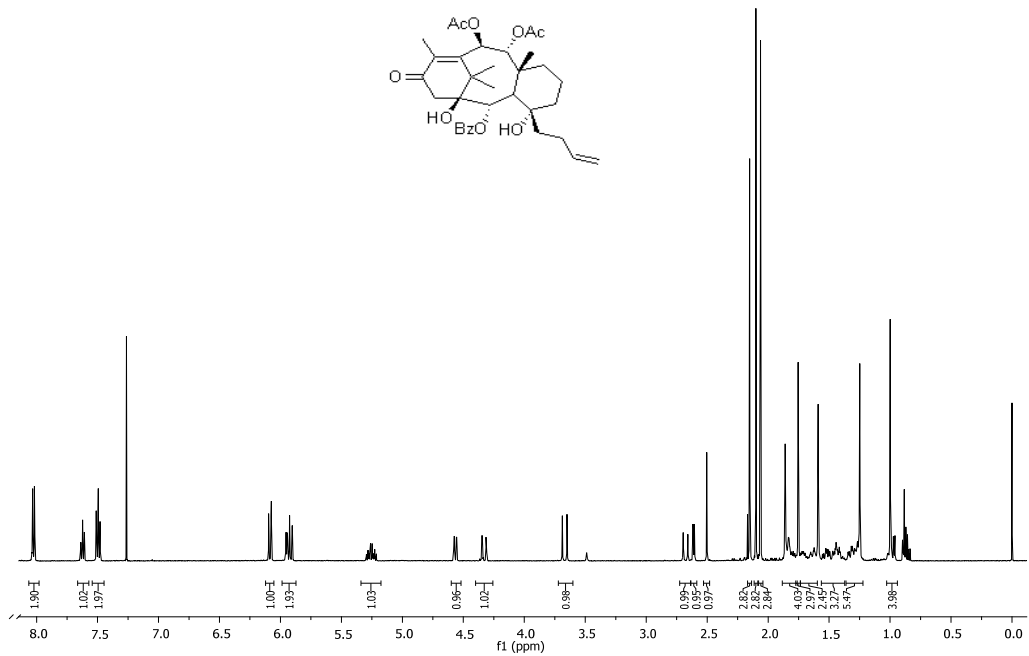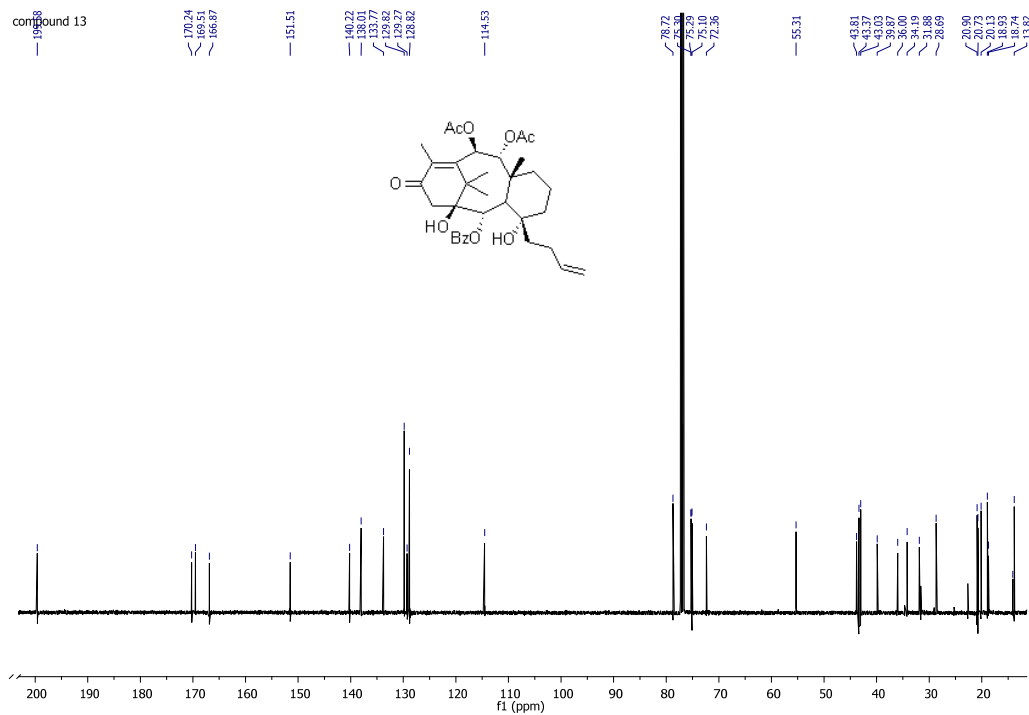





Compound 16

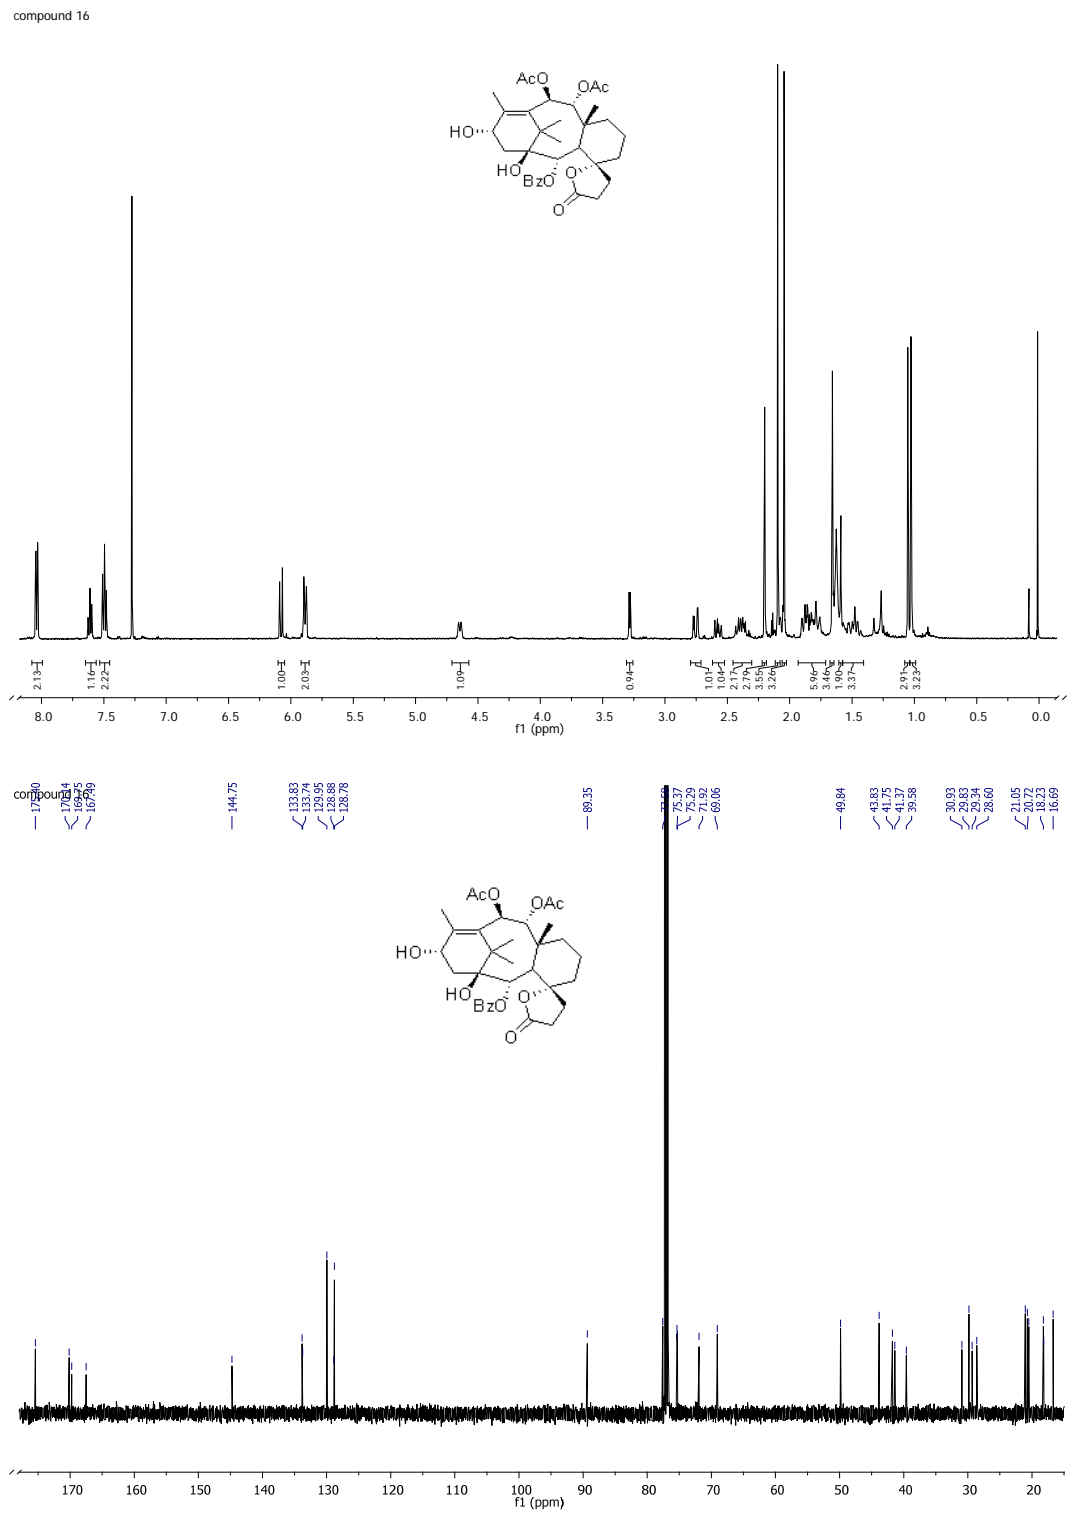



## Tubulin polymerization assay

Effect of compound **6** on tubulin polymerization was determined using method of Gaskin, Cantor and Shelanski,<sup>i</sup> with some modifications. Tubulin was isolated from bovine brain as described previously.<sup>ii</sup> Freshly prepared tubulin solution at approximate concentration of 2.2 mg/ml and MES (2-(*N*-morpholino)ethanesulfonic acid) buffer containing GTP were kept on ice before the experiment. Stock solutions of paclitaxel and compound **6** were prepared in DMSO at concentration of  $10^{-2}$  M, and afterwards diluted with DMSO/H<sub>2</sub>O (1:1 v/v) to  $10^{-3}$  M. From this solution, the desired concentrations (in range of 1-1000  $\mu$ M) were prepared in H<sub>2</sub>O. Solutions of various concentrations of paclitaxel (positive control) and examined compound **6** (40  $\mu$ L) were added to a tubulin solution (360  $\mu$ L) and incubated for 45 minutes at 37 °C. Mixture of 40  $\mu$ L MES buffer and 360 of  $\mu$ L tubulin solution was used as blank. After incubation, solutions were transferred to UV cuvettes and absorbance was measured at 350 nm continuously for 15 minutes on an instrument cooled to 4 °C. Percentage of tubulin polymerization was determined as difference in absorbance at t=0 min (37 °C) and t=15 min (4 °C), comparing to corresponding difference for a blank. Effect of paclitaxel and investigated compound **6** on polymerization of purified tubulin was expressed as IC<sub>50</sub>, i.e. concentration of agents producing 50% tubulin polymerization. UV absorption was measured on a GBC Cintra 40 UV-Visible spectrometer equipped with thermostatic circulator Petrotest 25-0395.

Different concentrations of compound **6** (0.1, 1, 5, 10, and 50  $\mu$ M) were incubated with tubulin solution and microtubule disassembly was followed turbidimetrically. The results are presented in Figure 1. The IC<sub>50</sub> value, determined by graphical method, was  $\sim 9$   $\mu$ M. Paclitaxel, which was used as positive control, showed IC<sub>50</sub> value of  $\sim 0.7$   $\mu$ M (Figure 2).

## Compound **6**

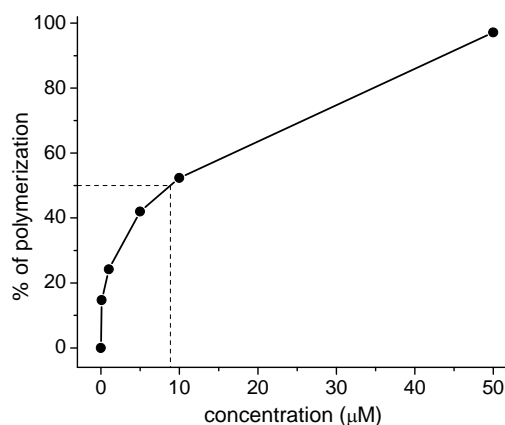

**Figure 1.** The effect of compound **6** on tubulin polymerization

| conc. ( $\mu$ M) | % of polimerization |
|------------------|---------------------|
| 0.1              | 14.73               |
| 1                | 24.19               |
| 5                | 41.99               |
| 10               | 52.32               |
| 50               | 97.16               |

# Paclitaxel

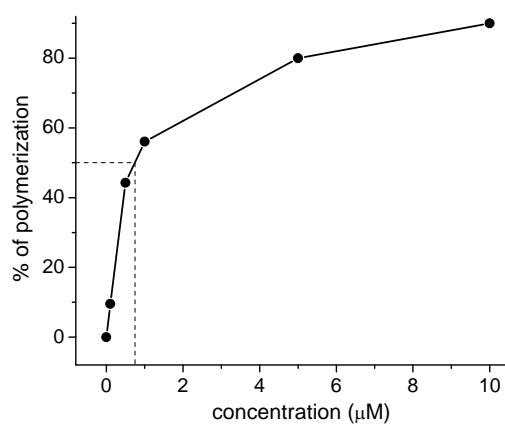

**Figure 2.** The effect of paclitaxel on tubulin polymerization

| conc. (μM) | % of polimerization |
|------------|---------------------|
| 0.1        | 9.5                 |
| 0.5        | 44.25               |
| 1          | 56.07               |
| 5          | 79.97               |
| 10         | 89.99               |

### Cytotoxicity of paclitaxel and compound **6** in L929 mouse fibrosarcoma cells

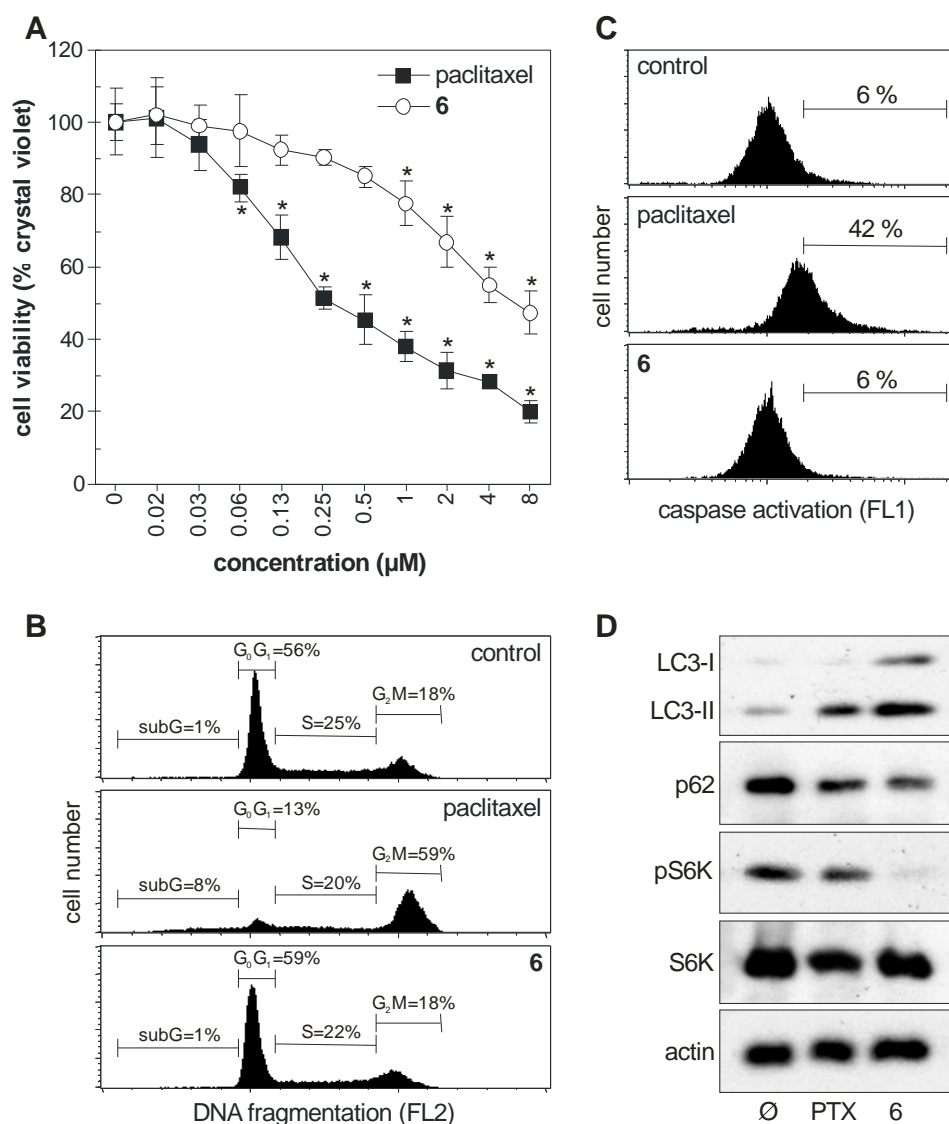

**Figure 3.** Cytotoxicity of paclitaxel and compound **6** in L929 mouse fibrosarcoma cells. (A) L929 cells were incubated with different concentrations of paclitaxel or compound **6** for 24 h and cell viability was assessed by crystal violet staining. Data are mean  $\pm$  SD of triplicate measurements (\* $p < 0.05$ ). (B-D) L929 cells were treated with paclitaxel (0.5  $\mu\text{M}$ ) or compound **6** (4  $\mu\text{M}$ ). Cell cycle distribution (B) and caspase activation (C) were determined by flow cytometry after 24 h, while immunoblot analysis of LC3 conversion, p62 and phospho-S6K (pS6K) levels was performed after 16 h of incubation (D).

<sup>i</sup>Gaskin, F.; Cantor, C. R.; Shelanski, M. L. Turbidimetric studies of the *in vitro* assembly and disassembly of porcine neurotubules. *J. Mol. Biol.* **1974**, *89*, 737–755.

<sup>ii</sup>Shelanski, M. L.; Gaskin, F.; Cantor, C. R. Microtubule Assembly in the Absence of Added Nucleotides. *Proc. Natl. Acad. Sci. U.S.A.* **1973**, *70*, 765–768.
